# Supplementary material
Source: PubMed Central journal article supplement (PMC5649373)
Supplement: NIHMS885965-supplement-1.pdf [file NIHMS885965-supplement-1.pdf]

## **SUPPLEMENTARY INFORMATION**

### **Compensatory mutations improve general permissiveness to antibiotic resistance plasmids**

Loftie-Eaton, W., Bashford, K., Quinn, H., Dong, K., Millstein, J., Hunter, S., Maureen Thomason, Houra Merrikh, Ponciano, J.M., and Top, E. M.

- I. P. 2: Supplemental Methods: From sigma to s: contextualizing our model parameters within the traditional plasmid cost literature**
- II. P. 6: Supplemental Figures**
- III. P. 15: Supplemental Tables**

## I. Supplemental Methods: From sigma to s: contextualizing our model parameters within the traditional plasmid cost literature.

Traditional competition experiments are based on the exponential growth model

$$n_t = n_0 e^{rt}, \quad (\text{eq. 1})$$

where  $r$  denotes the intrinsic growth rate,  $n_0$  is the initial population size of the experiment and time  $t$  is assumed to be continuous. From this equation, it follows that

$$\frac{n_t}{n_0} = e^{rt} \text{ or } \ln \frac{n_t}{n_0} = r(t - 0), \quad (\text{eq.2})$$

where the 0 emphasizes that the  $t$  is really measuring the time elapsed since the beginning of the growth experiment. Equation (2) is the basis to easily estimate the intrinsic growth rate if at the end of a growth experiment one has initial population size and final population size estimates. To avoid confusion, let's denote the observed initial population size at time  $t_1$  as  $n_1$  and the final population size recorded at time  $t_2$  as  $n_2$ . Then, the estimate of  $r$  can be computed by plugging these quantities into equation 2 and solving for its value:

$$\ln \left( \frac{n_2}{n_1} \right) = r(t_2 - t_1) \text{ or } \hat{r} = \frac{\ln n_2 - \ln n_1}{t_2 - t_1}.$$

This estimate is the slope of the population growth curve when it is plotted on a logarithmic (base e) scale. The ratio of two different estimates of the intrinsic growth rate is usually denoted as  $W$ . Now, in our model, time is measured in generations of plasmid-carrying cells. That is, one "average" generation time is set to be one unit of time in the model. Then, from one time step to the other, the number of plasmid-carrying cells simply doubles. The number of plasmid-free cells, however, will grow at a slightly different rate. If the plasmid imposes a "cost", that we will denote by  $\sigma$ , then the plasmid-free cells will grow at a rate slightly bigger than 2 between one time step and the other. The growth model of the plasmid-free cells (obviating conjugation and segregation) will then be given by:

$$n_t = n_{t-1} 2^{1+\sigma}. \quad (\text{eq. 3})$$

Note that this formulation is very general in that it does not preclude the difference in growth rate to be negative. That is, if  $\sigma$  were to be negative, then it would be indicating that the plasmid-carrying cells have an advantage of growth relative to the plasmid-free cells. Starting at time 0 to find population size at time 1, then iterating this operation by starting at time 1 to find the population size at time 2 and so on, it is easy to find that

$$n_t = n_0 \left(2^{1+\sigma}\right)^t, \text{ or } n_t = n_0 \lambda^t, \quad (\text{eq. 4})$$

where  $\lambda = 2^{1+\sigma}$  is the finite rate of increase. This growth model is a geometric growth model. Now, the exponential model can be linked with the geometric model. When  $t$  matches the same generation times than the discrete-time model,

$$n_t = n_0 e^{rt} = n_0 \left(e^r\right)^t = n_0 \lambda^t, \quad (\text{eq. 5})$$

where the finite rate of increase is now written as a function of the intrinsic growth rate. Equating these two ways of writing the finite rate of increase then gives

$$\ln\left(2^{1+\sigma}\right) = \ln\left(e^r\right) \Leftrightarrow (1+\sigma)\ln 2 = r,$$

which implies that

$$\sigma = \frac{r - \ln 2}{\ln 2}. \quad (\text{eq. 6})$$

These two last equations then allow a direct transformation between our mathematical model cost estimates and the traditional competition experiments 'cost' estimates.

Traditional 'cost' estimates take as the reference strain the plasmid-free strain, and aim at measuring how much slower than the plasmid-free strain does the plasmid-carrying strain grows. The ratio of the estimates of the intrinsic growth rates for both strains is used to estimate the 'relative fitness', usually denoted as  $W$  in the following way: let  $r_{p^+}$  and  $r_{p^-}$  be the intrinsic growth rates of the plasmid carrying strain and plasmid-free strain respectively. Using equation 5, the finite rate of increase of these strains is usually defined as  $\ln \lambda_{p^+}$  and  $\ln \lambda_{p^-}^{\text{ref}}$ , where the 'ref' notation emphasizes that doubling time of the plasmid-free cells is taken as the reference time of the geometric growth model. In that case, denoting as  $S$  the plasmid cost, it follows that

$$W = \frac{r_{p^+}}{r_{p^-}} = \frac{\ln \lambda_{p^+}}{\ln \lambda_{p^-}^{\text{ref}}} = \frac{\ln 2^{1-s}}{\ln 2} = 1 - s.$$

In our models, on the other hand, the definition of the time interval is anchored in the growth rate of the plasmid-carrying cell, because it was the strain for which we had extensive records and had good information regarding the doubling time: we knew it was about 10 generations per day. In that case, the plasmid-carrying cells are assumed to double within one time step while the plasmid-free cells grow at a rate a little faster than 2. Writing, as we do in the main text, the cost as  $\sigma$ , it follows that the relative fitness can be written as

$$W = \frac{r_1}{r_2} = \frac{\ln \lambda_{p^+}^{\text{ref}}}{\ln \lambda_{p^-}} = \frac{\ln 2}{\ln 2^{1+\sigma}} = \frac{1}{1+\sigma}.$$

Equating both definitions of the relative fitness results in a simple equation to convert our 'cost' to the cost usually reported in competition experiments:

$$1 - s = W = \frac{1}{1 + \sigma}.$$

Then, solving for  $S$  as a function of  $\sigma$  gives:

$$s = \frac{\sigma}{1 + \sigma} \quad \text{and}$$

whereas solving for  $\sigma$  as a function of  $S$  gives:

$$\sigma = \frac{s}{1 - s}.$$

Because both the data from our competition assays and plasmid persistence assays have the same structure (counts of resistant and total colonies at multiple time points), we were able to write a joint likelihood for the data obtained from both assays that leverages the total information to obtain a single estimate of  $\sigma$ . This likelihood function is just the product of the two likelihood functions for each particular data set (See De Gelder *et al.* 2004, equation 9, or Ponciano *et al.* 2007, equation 12), written under the constraint that the cost parameter needs to be kept identical under both assays. This joint estimation considerably improves the precision of the estimates of cost (see Table S3). Combining the information from both assays is particularly helpful when the plasmid persistence assays do not change much over time. This is because the persistence assays, by beginning with 100% plasmid-bearing cells, impose a waiting time until enough plasmid-free cells appear to exert an observable fitness differential. In contrast, the competition assays begin with a

50/50 proportion of plasmid-free and plasmid-bearing strains, making it more likely that a significant difference in fitness will be measured when the plasmid has a non-zero fitness cost or benefit.

**References:**

1. De Gelder, L., Ponciano, J. , Abdo, Z., Joyce, P., Forney, L.J., & Top E.M.. 2004. Combining mathematical models and statistical methods to understand and predict the dynamics of antibiotic sensitive mutants in a population of resistant bacteria during experimental evolution. *Genetics* 168: 1131-1144.
2. Ponciano J.M., De Gelder, L., Top, E. M. & Joyce P. The population biology of bacterial plasmids: a hidden Markov model approach. *Genetics* **176**, 957-968 (2007)

## II. Supplemental Figures

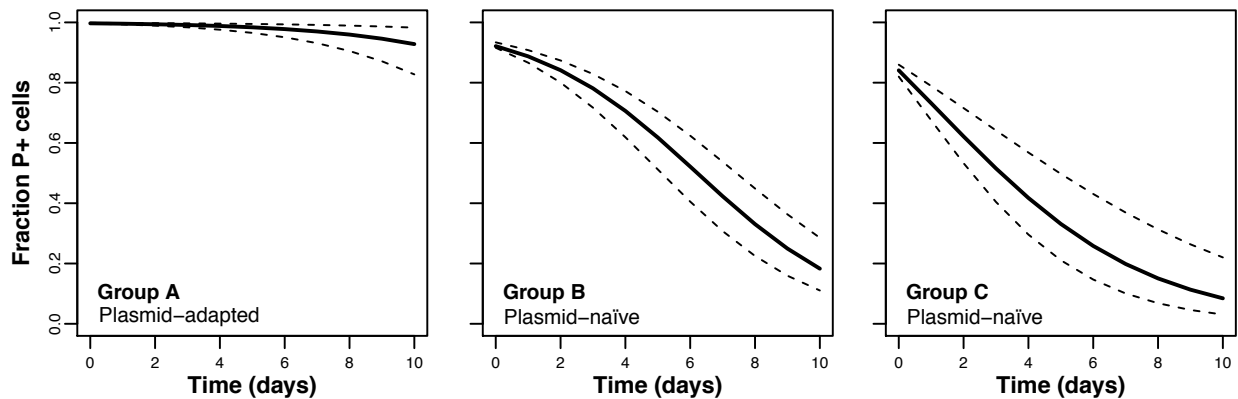

**Fig. S1.** Modeled plasmid persistence profiles for each group (See Fig. 2) show that plasmid persistence was significantly greater for all RP4-adapted strains (Group A) than in the plasmid-naïve strains in Groups B and C. Plasmid persistence profiles in Group B (evolved plasmids in ancestral host ( $H_{AP_E}$ )) and Group C (all ancestral or control hosts with the ancestral plasmids) were more similar yet distinct (also see Supplemental Tables 2, 3).

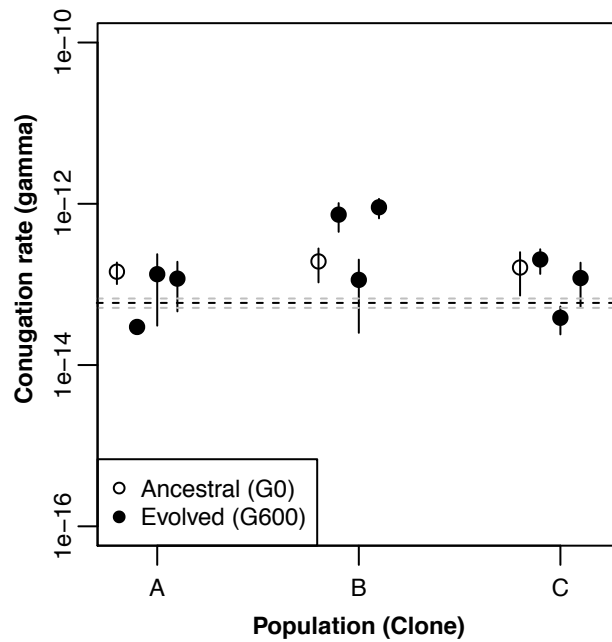

**Fig. S2. Conjugation rate for the ancestor (empty circle) and three evolved (filled circle) clones from the three replicate populations.** The black (mean) and grey (standard deviation) dotted lines represent the background conjugation frequency that occurs on the agar plates rather than in the liquid media and was measured by spreading separate donor and recipient cultures, at densities similar to the experimental mixed cultures, onto the same transconjugant-selective agar plate. No significant differences were observed between any evolved clones and their corresponding ancestor based on Welch t-tests. Evolved clones in each population are ordered sequentially from 1 to 3.

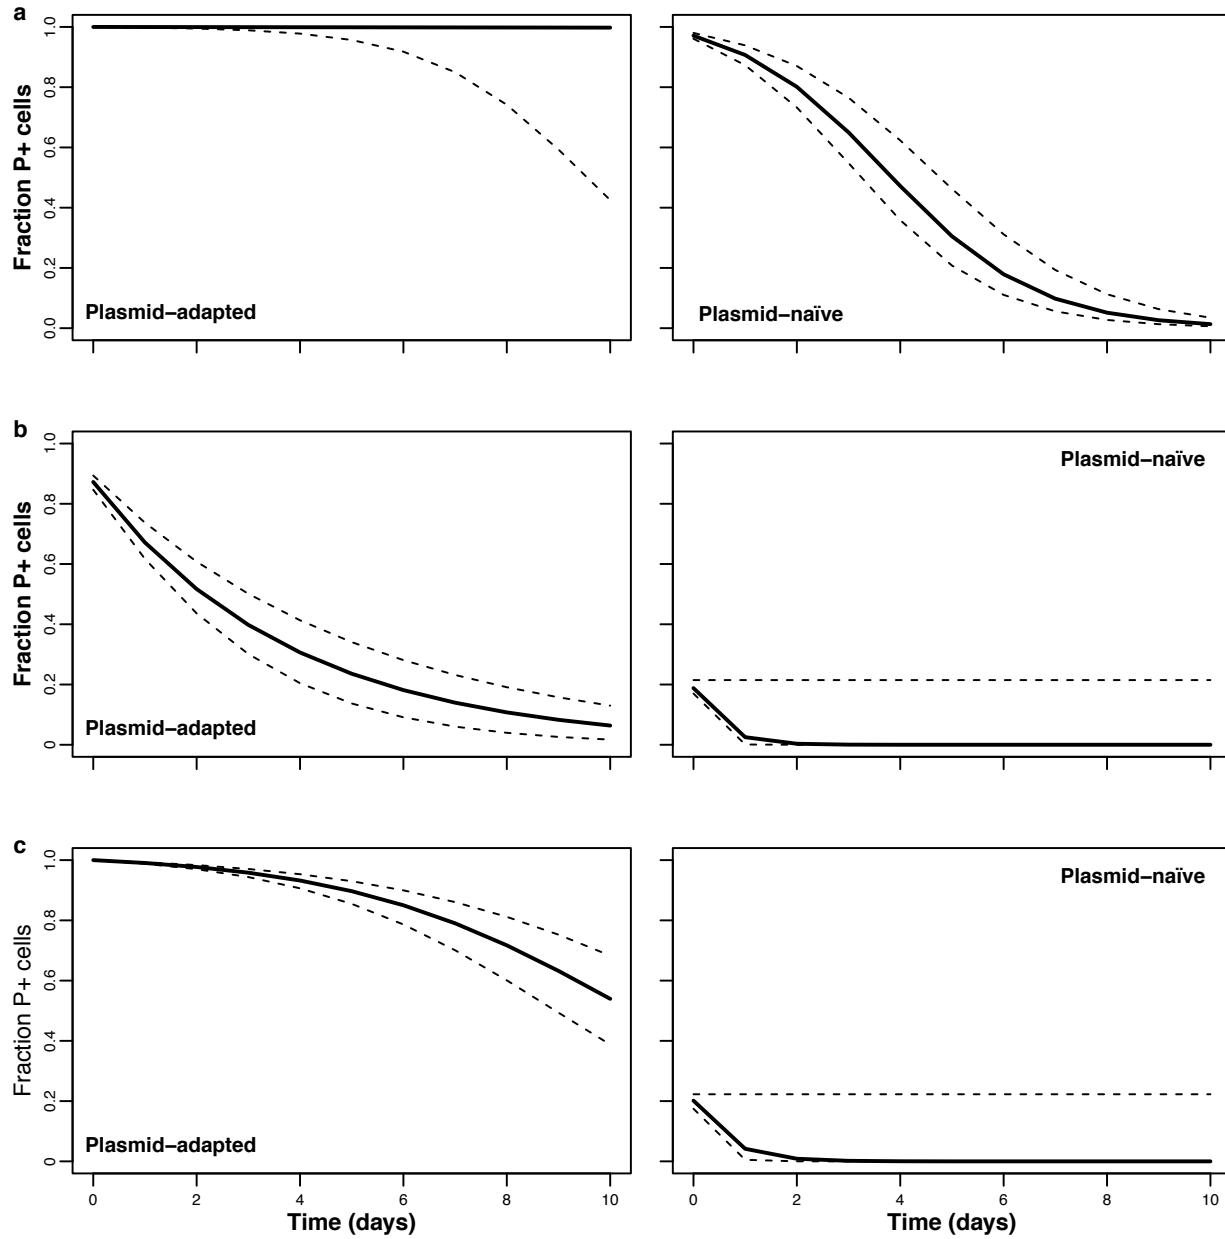

**Fig. S3. Modeling of the group profiles for ancestral, evolved and control clones containing either of the three alternate plasmids, pB10, Rsa and RSF1010 (A to C, respectively) shows that plasmid persistence in RP4-adapted hosts was significantly greater than in the plasmid-naïve hosts (see also Supplemental Table 4).**



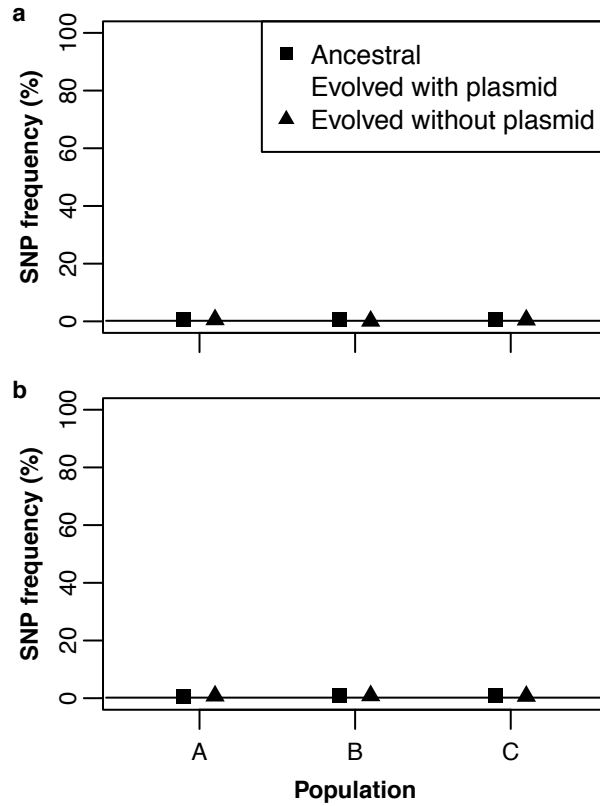

**Fig. S4. The frequency of the (A) Xpd/Rad3<sub>D672A</sub> and (B) P<sub>UvrDA-32C</sub> alleles in each of the ancestral, evolved and control populations.** The solid line in each panel represents the sequencing error frequency for that specific nucleotide substitution measured over the whole length of the amplicon.

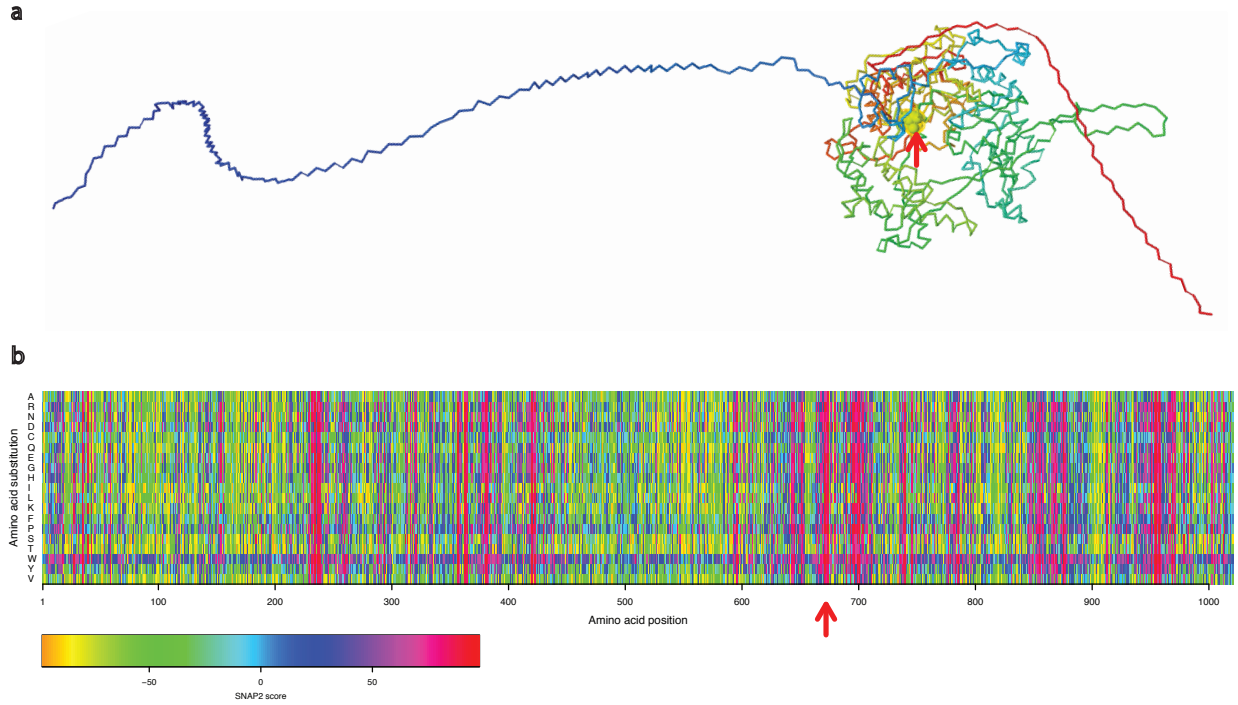

**Fig. S5. Analysis of the CDS encoding the Xpd/Rad3-like helicase.** (A) The Xpd/Rad3-like helicase domain (multicolored) is located at the C-terminus of the polypeptide. The structure of the N-terminus (dark blue) could not be predicted. (B). Effect of amino acid substitution on protein structure. A high SNAP2 score means that the specific substitution in that location is likely to have a strong effect on protein structure. The Xpd/Rad3<sub>D672A</sub> residue is indicated by a red arrow.

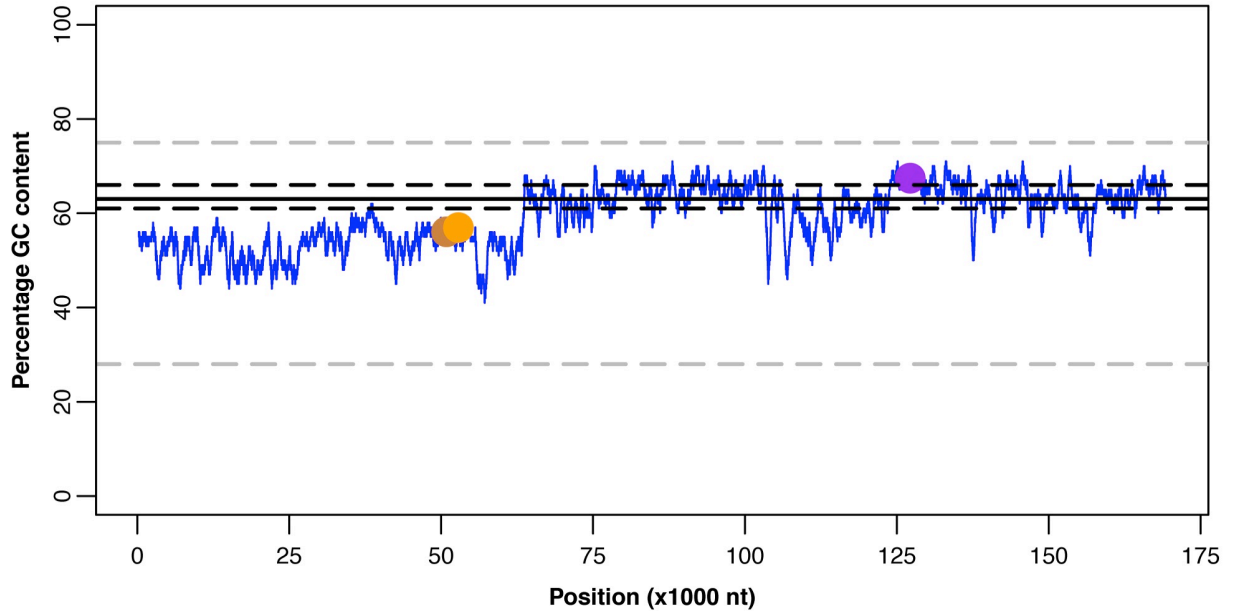

**Fig. S6. Percentage GC content across the length of contig00024.** The blue line represents the percentage GC content for contig00024. The solid black line represents the mean percentage GC content across the whole genome while the black and grey broken lines represent the first and third quartiles of the GC content across the whole genome, respectively. GC content was calculated using a 250 bp sliding window. All the SNPs found on this contig are indicated; the brown, orange and purple dots represent the Xpd/Rad3<sub>D672A</sub>, P<sub>UvrDA-32C</sub> and BcsC<sub>Q659Q</sub> loci, respectively.

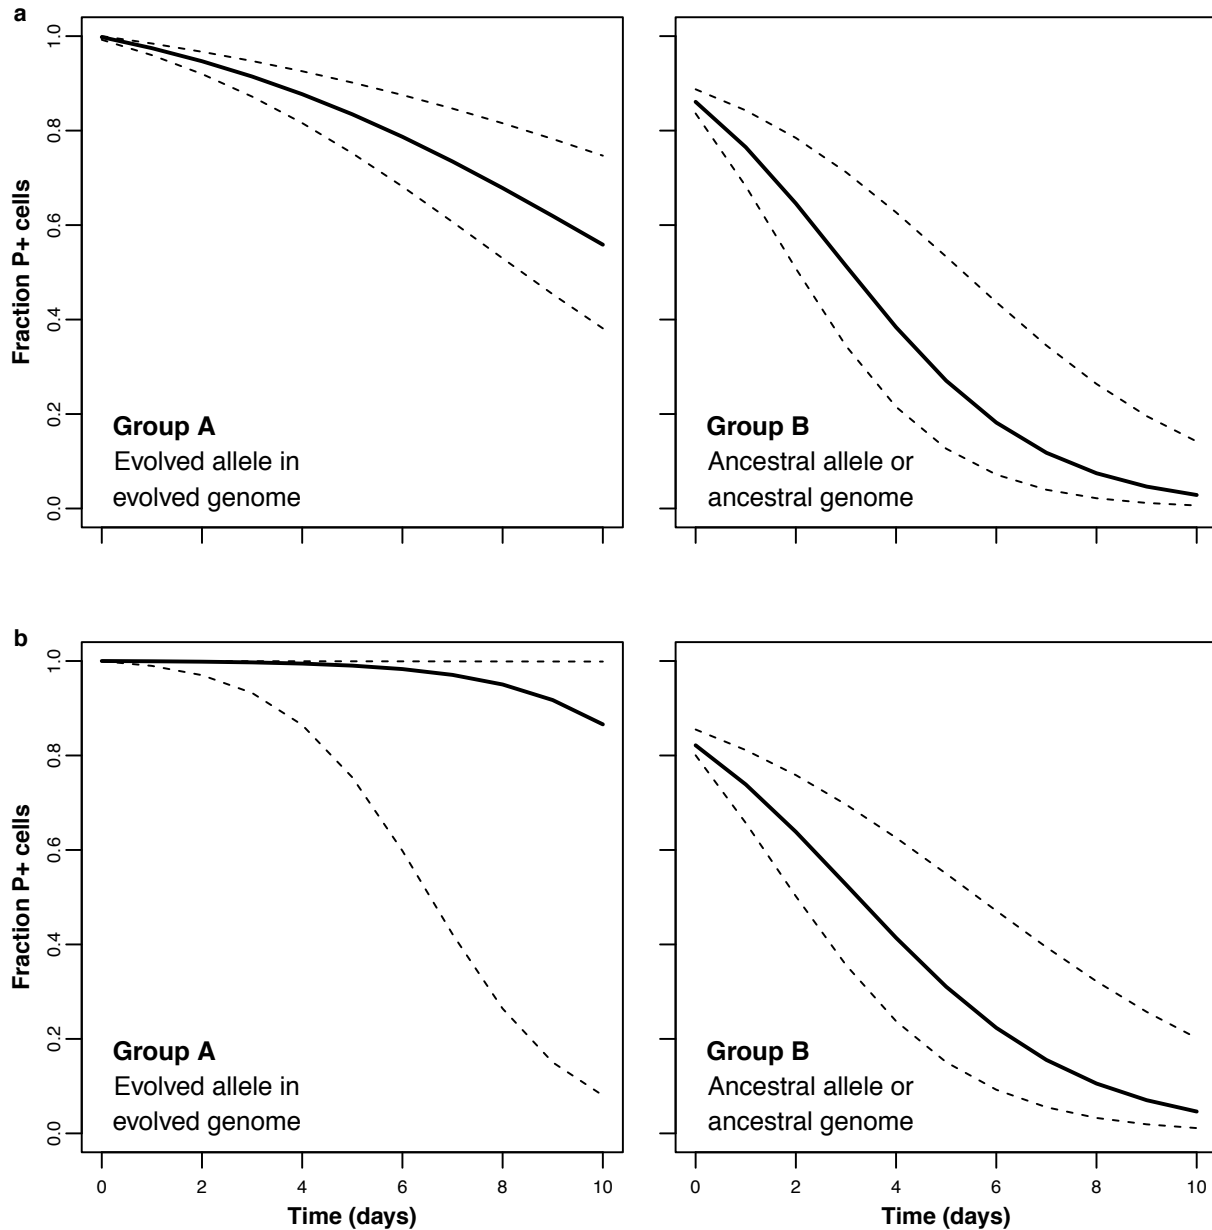

**Fig. S7. Following the allelic exchange experiments, modeling of the grouped plasmid persistence profiles shows that Group A, which represents the evolved alleles in an evolved genome (A, Xpd/Rad3<sub>D672A</sub>; B, P<sub>uvrD\_A-32C</sub>), exhibits greater plasmid persistence than Group B, which represents the ancestral helicase alleles (A, Xpd/Rad3; B, P<sub>uvrD</sub>), in a control or ancestral genome, or the respective evolved alleles in the ancestral genome.**

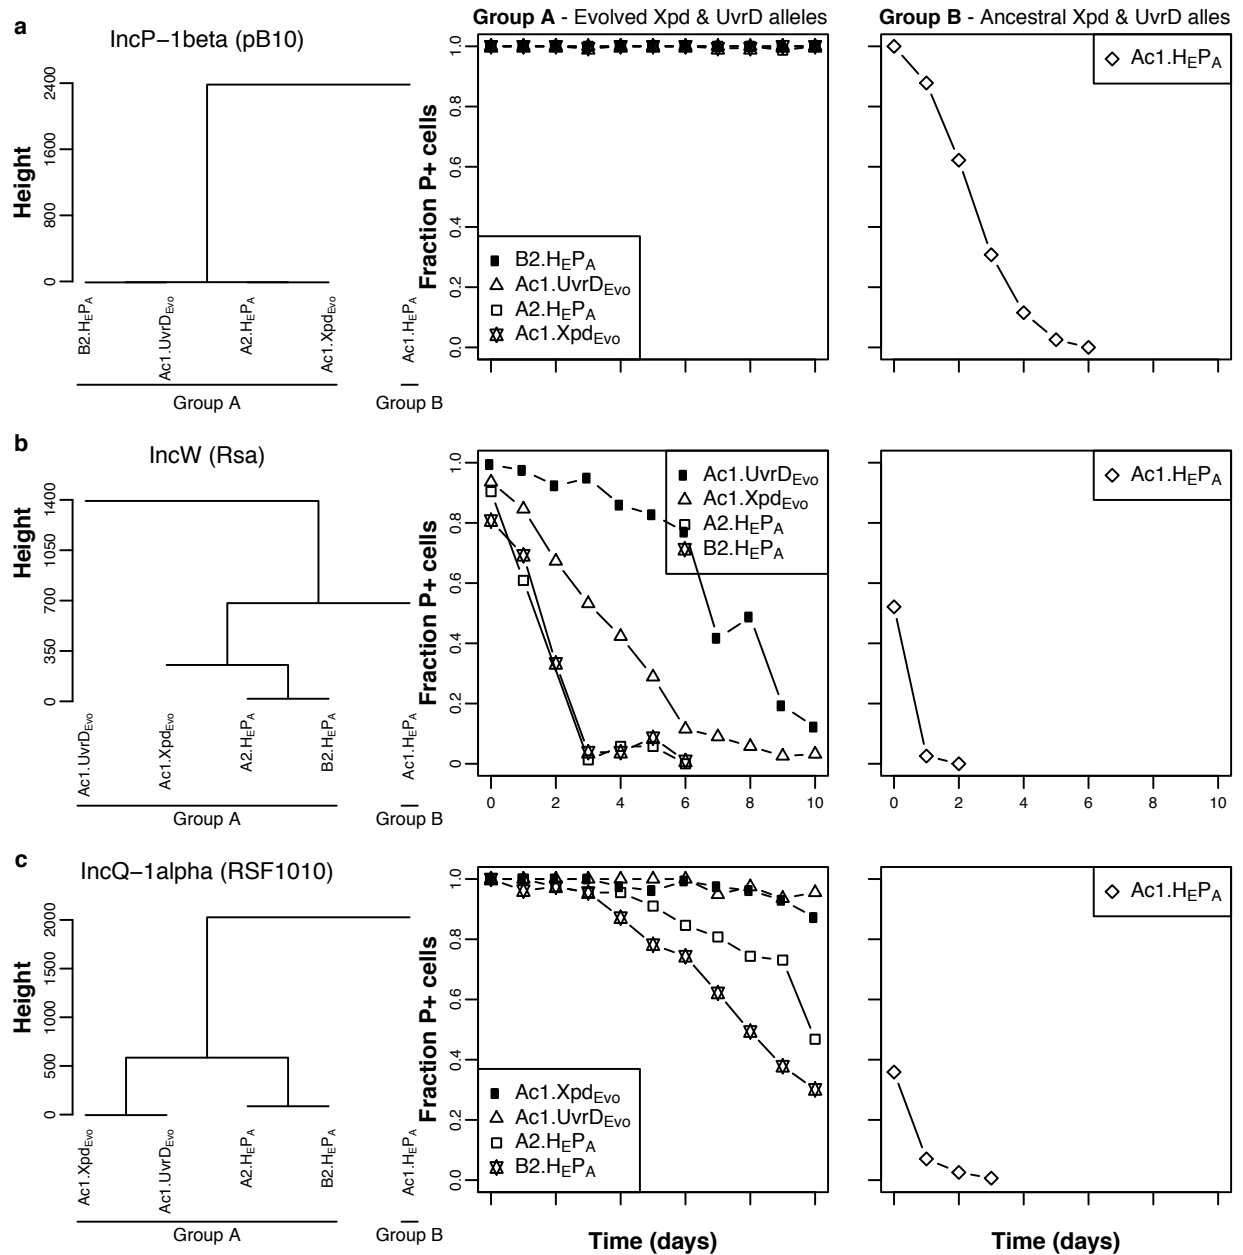

**Fig. S8.** The persistence dynamics of plasmids (a) pB10, (b) Rsa and (c) RSF1010 in control strain Ac1 containing either the evolved alleles Xpd/Rad3<sub>D672A</sub> or P<sub>UvrD\_A-32C</sub> are more similar to those of the plasmid-adapted strains containing equivalent alleles, than to the Ac1 control strain containing the ancestral Xpd and UvrD alleles. Each data point represents the mean fraction of plasmid-containing (P+) cells (n = 3).

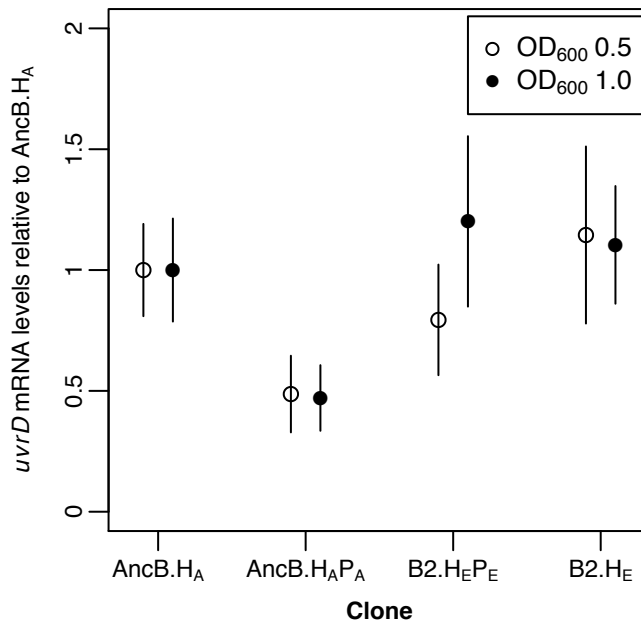

**Fig. S9. *uvrD* mRNA levels for a plasmid-containing ancestral clone (AncB.H<sub>A</sub>P<sub>A</sub>) and plasmid-containing and plasmid-free evolved clones (B2.H<sub>E</sub>P<sub>E</sub> and B2.H<sub>E</sub>, respectively) relative to a plasmid-free ancestral clone (AncB.H<sub>A</sub>), measured for mid-exponential (OD<sub>600</sub> 0.5) and stationary phase (OD<sub>600</sub> 1.0) cultures.** Gene expression levels were normalized between samples using the 16S rRNA levels. Each data point consists of three biological and two technical repeats. Error bars indicate the standard error. The only strain that showed a significantly different *uvrD* gene expression level relative to the ancestor was the plasmid-containing ancestor AncB.H<sub>A</sub>P<sub>A</sub> (Adjusted P value < 0.05).

### III. Supplemental Tables, except for Tables S5 and S9, which are in Supplementary file S2 (Excel).

**Table S1. Estimated plasmid persistence dynamics and Bayesian Information Criteria (BIC) for the ancestral and evolved plasmid-host permutations, and the three groups into which they clustered. Parameter estimates are based on the persistence data (Figs. 2, S1).**

| Strain permutation <sup>D</sup>    | Group <sup>E</sup> | $\lambda^A$            |                  |            | $\sigma^B$ |          |            | $T_{1\%}^C$       |      |            | BIC <sup>H</sup> |
|------------------------------------|--------------------|------------------------|------------------|------------|------------|----------|------------|-------------------|------|------------|------------------|
|                                    |                    | CI (2.5%) <sup>F</sup> | MLE <sup>G</sup> | CI (97.5%) | CI (2.5%)  | MLE      | CI (97.5%) | CI (2.5%)         | MLE  | CI (97.5%) |                  |
| AncA.H <sub>A</sub> P <sub>A</sub> | C                  | 3.03E-09               | 5.60E-09         | 7.21E-03   | 3.83E-02   | 6.19E-02 | 6.67E-02   | 11                | 15   | 26         | 184              |
| AncB.H <sub>A</sub> P <sub>A</sub> | C                  | 1.62E-09               | 1.47E-03         | 7.20E-03   | 4.87E-02   | 6.61E-02 | 7.41E-02   | 10                | 13   | 20         | 206              |
| AncC.H <sub>A</sub> P <sub>A</sub> | C                  | 1.05E-09               | 6.73E-08         | 4.83E-03   | 6.03E-02   | 7.28E-02 | 7.86E-02   | 10                | 13   | 16         | 198              |
| A1.H <sub>E</sub> P <sub>E</sub>   | A                  | 2.66E-05               | 2.33E-04         | 3.75E-04   | 5.07E-16   | 3.00E-08 | 8.91E-03   | >100 <sup>I</sup> | >100 | >100       | 91               |
| A2.H <sub>E</sub> P <sub>E</sub>   | A                  | 3.53E-09               | 2.21E-05         | 3.31E-04   | 2.67E-11   | 3.16E-02 | 5.50E-02   | 23                | 46   | >100       | 83               |
| A3.H <sub>E</sub> P <sub>E</sub>   | A                  | 1.24E-12               | 2.16E-11         | 1.35E-04   | 5.03E-11   | 3.67E-02 | 9.75E-02   | 15                | 45   | >100       | 46               |
| B1.H <sub>E</sub> P <sub>E</sub>   | A                  | 1.01E-09               | 4.67E-05         | 9.97E-05   | 3.80E-21   | 5.37E-09 | 8.67E-02   | 17                | >100 | >100       | 33               |
| B2.H <sub>E</sub> P <sub>E</sub>   | A                  | 1.04E-12               | 4.81E-06         | 3.72E-05   | 2.65E-02   | 8.09E-02 | 2.78E-01   | 7                 | 25   | 37         | 38               |
| B3.H <sub>E</sub> P <sub>E</sub>   | A                  | 6.32E-35               | 2.33E-05         | 5.30E-05   | 8.32E-49   | 4.06E-15 | 1.14E-01   | 13                | >100 | >100       | 25               |
| C1.H <sub>E</sub> P <sub>E</sub>   | A                  | 6.18E-12               | 9.18E-10         | 4.09E-04   | 5.11E-10   | 2.63E-02 | 4.34E-02   | 27                | 53   | >100       | 91               |
| C2.H <sub>E</sub> P <sub>E</sub>   | A                  | 1.57E-06               | 1.35E-05         | 4.76E-04   | 2.52E-11   | 9.39E-02 | 1.28E-01   | 11                | 20   | >100       | 71               |
| C3.H <sub>E</sub> P <sub>E</sub>   | A                  | 2.28E-12               | 3.32E-11         | 2.21E-05   | 8.01E-02   | 1.06E-01 | 1.52E-01   | 12                | 19   | 12         | 76               |
| A1.H <sub>E</sub> P <sub>A</sub>   | A                  | 4.56E-05               | 1.33E-04         | 1.00E-03   | 3.86E-03   | 6.30E-02 | 8.51E-02   | 14                | 24   | >100       | 130              |
| A2.H <sub>E</sub> P <sub>A</sub>   | A                  | 2.38E-05               | 6.89E-04         | 1.49E-03   | 4.48E-15   | 1.83E-02 | 4.52E-02   | 23                | 56   | >100       | 152              |
| A3.H <sub>E</sub> P <sub>A</sub>   | A                  | 3.67E-05               | 1.05E-04         | 4.16E-04   | 9.88E-08   | 5.04E-02 | 7.06E-02   | 19                | 30   | >100       | 82               |
| B1.H <sub>E</sub> P <sub>A</sub>   | A                  | 3.46E-10               | 4.72E-06         | 1.05E-04   | 3.76E-17   | 7.13E-02 | 2.05E-01   | 8                 | 28   | >100       | 33               |
| B2.H <sub>E</sub> P <sub>A</sub>   | A                  | 4.68E-05               | 1.31E-04         | 7.84E-04   | 2.15E-07   | 6.04E-02 | 8.23E-02   | 15                | 25   | >100       | 96               |
| B3.H <sub>E</sub> P <sub>A</sub>   | A                  | 6.48E-05               | 1.78E-04         | 3.65E-04   | 1.49E-13   | 2.16E-02 | 4.64E-02   | 28                | 60   | >100       | 94               |
| C1.H <sub>E</sub> P <sub>A</sub>   | A                  | 5.63E-11               | 9.54E-05         | 1.19E-03   | 4.03E-09   | 2.32E-02 | 3.34E-02   | 29                | 50   | >100       | 136              |
| C2.H <sub>E</sub> P <sub>A</sub>   | A                  | 1.29E-04               | 3.55E-04         | 4.50E-04   | 3.12E-11   | 2.15E-10 | 2.61E-02   | 44                | >100 | >100       | 132              |
| C3.H <sub>E</sub> P <sub>A</sub>   | A                  | 1.59E-08               | 5.08E-04         | 1.11E-03   | 6.19E-08   | 1.56E-02 | 3.73E-02   | 28                | 67   | >100       | 132              |
| A1.H <sub>A</sub> P <sub>E</sub>   | B                  | 1.15E-10               | 2.78E-10         | 2.67E-03   | 4.96E-02   | 6.14E-02 | 6.61E-02   | 14                | 17   | 20         | 216              |
| A2.H <sub>A</sub> P <sub>E</sub>   | B                  | 9.77E-11               | 1.55E-10         | 3.07E-03   | 5.88E-02   | 7.17E-02 | 7.90E-02   | 11                | 14   | 17         | 223              |
| A3.H <sub>A</sub> P <sub>E</sub>   | B                  | 7.00E-11               | 4.80E-11         | 2.83E-03   | 3.88E-02   | 5.39E-02 | 5.76E-02   | 15                | 19   | 25         | 214              |
| B1.H <sub>A</sub> P <sub>E</sub>   | B                  | 1.41E-10               | 1.19E-09         | 3.53E-03   | 3.34E-02   | 5.01E-02 | 5.57E-02   | 15                | 20   | 29         | 215              |
| B2.H <sub>A</sub> P <sub>E</sub>   | B                  | 3.57E-11               | 5.51E-10         | 3.48E-03   | 4.52E-02   | 5.72E-02 | 6.39E-02   | 13                | 17   | 22         | 238              |
| B3.H <sub>A</sub> P <sub>E</sub>   | B                  | 1.09E-10               | 9.95E-10         | 2.66E-03   | 3.58E-02   | 5.26E-02 | 5.68E-02   | 15                | 19   | 27         | 213              |
| C1.H <sub>A</sub> P <sub>E</sub>   | B                  | 9.93E-11               | 3.84E-10         | 2.87E-03   | 5.12E-02   | 6.39E-02 | 6.98E-02   | 13                | 17   | 19         | 280              |
| C2.H <sub>A</sub> P <sub>E</sub>   | B                  | 7.44E-10               | 9.43E-10         | 3.42E-03   | 3.73E-02   | 5.30E-02 | 5.61E-02   | 15                | 19   | 26         | 200              |
| C3.H <sub>A</sub> P <sub>E</sub>   | B                  | 1.19E-10               | 1.38E-09         | 2.65E-03   | 4.20E-02   | 5.71E-02 | 6.14E-02   | 15                | 19   | 23         | 225              |
| Ac.H <sub>E</sub> P <sub>A</sub>   | C                  | 1.34E-08               | 7.54E-03         | 1.65E-02   | 3.10E-02   | 5.36E-02 | 7.57E-02   | 7                 | 12   | 32         | 189              |
| Bc.H <sub>E</sub> P <sub>A</sub>   | C                  | 9.15E-03               | 2.09E-02         | 2.22E-02   | 1.24E-09   | 3.42E-09 | 2.63E-02   | 12                | 21   | 49         | 186              |
| Cc.H <sub>E</sub> PA               | C                  | 5.53E-03               | 1.32E-02         | 1.49E-02   | 1.22E-08   | 1.25E-08 | 2.12E-02   | 16                | 33   | 81         | 208              |
| Group dynamics                     | A                  | 1.28E-07               | 2.64E-05         | 1.29E-04   | 3.20E-02   | 4.33E-02 | 4.83E-02   | 28                | 34   | 49         | 2017             |
| Group dynamics                     | B                  | 3.16E-10               | 4.98E-11         | 1.14E-03   | 5.25E-02   | 5.71E-02 | 5.84E-02   | 16                | 18   | 20         | 2109             |
| Group dynamics                     | C                  | 5.68E-03               | 9.17E-03         | 1.29E-02   | 2.13E-02   | 3.21E-02 | 4.21E-02   | 12                | 17   | 26         | 1439             |

<sup>A</sup>  $\lambda$ , segregational loss frequency; <sup>B</sup>  $\sigma$ , plasmid cost; <sup>C</sup>  $T_{1\%}$ , time (in days) to 1% plasmid retention, or 99% plasmid loss; based on initial and final fraction of P- cells of 0 and 0.99, respectively; <sup>D</sup> H<sub>A</sub>P<sub>A</sub> ancestral host and plasmid, H<sub>A</sub>P<sub>E</sub> ancestral host and evolved plasmid, H<sub>E</sub>P<sub>E</sub> evolved host and plasmid, H<sub>E</sub>P<sub>A</sub> evolved host and ancestral plasmid; <sup>E</sup> Grouping is based on cluster analysis, see Fig. 2A; <sup>F</sup> CI, confidence interval; <sup>G</sup> Maximum Likelihood Estimate; <sup>H</sup> Bayesian information criteria; <sup>I</sup> exceeds 100 days.

**Table S2. BIC for the segregation and selection (SS) and horizontal transfer (HT) models based on the plasmid persistence profile for each ancestral<sup>a</sup> and evolved<sup>b</sup> plasmid-containing clone.**

| Clone                              | BIC SS | BIC HT |
|------------------------------------|--------|--------|
| AncA.H <sub>A</sub> P <sub>A</sub> | 184    | 191    |
| A1.H <sub>E</sub> P <sub>E</sub>   | 91     | 98     |
| A2.H <sub>E</sub> P <sub>E</sub>   | 83     | 90     |
| A3.H <sub>E</sub> P <sub>E</sub>   | 46     | 53     |
| AncB.H <sub>A</sub> P <sub>A</sub> | 206    | 213    |
| B1.H <sub>E</sub> P <sub>E</sub>   | 33     | 40     |
| B2.H <sub>E</sub> P <sub>E</sub>   | 38     | 45     |
| B3.H <sub>E</sub> P <sub>E</sub>   | 25     | 32     |
| AncC.H <sub>A</sub> P <sub>A</sub> | 198    | 205    |
| C1.H <sub>E</sub> P <sub>E</sub>   | 91     | 98     |
| C2.H <sub>E</sub> P <sub>E</sub>   | 70     | 78     |
| C3.H <sub>E</sub> P <sub>E</sub>   | 76     | 83     |

<sup>a</sup> Ancestral host and plasmid (H<sub>A</sub>P<sub>A</sub>)

<sup>b</sup> Evolved host and plasmid (H<sub>E</sub>P<sub>E</sub>)

**Table S3. Segregational loss frequency ( $\lambda$ ) and cost ( $\sigma$ ) MLEs for the ancestral<sup>a</sup> and evolved<sup>b</sup> clones and the corresponding BIC. Parameters were jointly estimated from competition (Fig. 3) and persistence data (Figs. 2, S1)**

| Strain                             | $\lambda$        |          |                    | $\sigma$         |           |                    | BIC |
|------------------------------------|------------------|----------|--------------------|------------------|-----------|--------------------|-----|
|                                    | CI Low<br>(2.5%) | MLE      | CI High<br>(97.5%) | CI Low<br>(2.5%) | MLE       | CI High<br>(97.5%) |     |
| AncA.H <sub>A</sub> P <sub>A</sub> | 4.70E-08         | 6.16E-08 | 4.16E-03           | 4.16E-03         | 5.25E-02  | 6.55E-02           | 252 |
| A1.H <sub>E</sub> P <sub>E</sub>   | 1.87E-04         | 4.79E-04 | 8.59E-04           | 8.59E-04         | -4.44E-02 | -2.47E-02          | 144 |
| A2.H <sub>E</sub> P <sub>E</sub>   | 1.20E-04         | 4.36E-04 | 6.83E-04           | 6.83E-04         | -4.69E-02 | -2.81E-02          | 143 |
| A3.H <sub>E</sub> P <sub>E</sub>   | 1.94E-10         | 1.28E-04 | 2.47E-04           | 2.47E-04         | -3.54E-02 | -2.58E-02          | 294 |
| AncB.H <sub>A</sub> P <sub>A</sub> | 1.67E-09         | 3.21E-07 | 4.65E-03           | 4.65E-03         | 6.52E-02  | 7.70E-02           | 301 |
| B1.H <sub>E</sub> P <sub>E</sub>   | 6.57E-12         | 2.09E-04 | 4.51E-04           | 4.51E-04         | -1.36E-01 | -1.11E-01          | 84  |
| B2.H <sub>E</sub> P <sub>E</sub>   | 9.78E-05         | 2.71E-04 | 4.79E-04           | 4.79E-04         | -8.60E-02 | -6.42E-02          | 98  |
| B3.H <sub>E</sub> P <sub>E</sub>   | 1.07E-13         | 8.33E-05 | 1.77E-04           | 1.77E-04         | -1.11E-01 | -8.44E-02          | 78  |
| AncC.H <sub>A</sub> P <sub>A</sub> | 7.00E-10         | 5.20E-07 | 5.87E-03           | 5.87E-03         | 6.19E-02  | 7.89E-02           | 282 |
| C1.H <sub>E</sub> P <sub>E</sub>   | 9.02E-04         | 1.52E-03 | 2.08E-03           | 2.08E-03         | -1.23E-01 | -1.02E-01          | 146 |
| C2.H <sub>E</sub> P <sub>E</sub>   | 1.50E-03         | 2.29E-03 | 3.37E-03           | 3.37E-03         | -1.53E-01 | -1.25E-01          | 218 |
| C3.H <sub>E</sub> P <sub>E</sub>   | 8.78E-04         | 1.46E-03 | 2.04E-03           | 2.04E-03         | -1.09E-01 | -8.48E-02          | 186 |

<sup>a</sup> Ancestral host and plasmid (H<sub>A</sub>P<sub>A</sub>)

<sup>b</sup> Evolved host and plasmid (H<sub>E</sub>P<sub>E</sub>)



**Table S4. Estimated plasmid persistence dynamics and BIC for the three alternate plasmids in the ancestral-, evolved- and control hosts, and the groups into which they clustered.**

| Plasmid          | Host           | Group <sup>A</sup> | $\lambda$ |          |            | $\sigma$  |          |            | $T_{1\%}$ |      |            | BIC  |
|------------------|----------------|--------------------|-----------|----------|------------|-----------|----------|------------|-----------|------|------------|------|
|                  |                |                    | CI (2.5%) | MLE      | CI (97.5%) | CI (2.5%) | MLE      | CI (97.5%) | CI (2.5%) | MLE  | CI (97.5%) |      |
| pB10             | AncA           | B                  | 1.80E-10  | 1.84E-09 | 3.22E-04   | 1.46E-01  | 1.62E-01 | 1.81E-01   | 8         | 10   | 23         | 127  |
|                  | AncB           | B                  | 1.32E-08  | 7.77E-04 | 1.41E-03   | 1.35E-01  | 1.47E-01 | 1.63E-01   | 7         | 9    | 22         | 165  |
|                  | AncC           | B                  | 1.54E-03  | 2.34E-03 | 3.24E-03   | 1.15E-01  | 1.27E-01 | 1.44E-01   | 8         | 9    | 11         | 166  |
|                  | A2*            | A                  | 6.32E-35  | 5.27E-07 | 5.84E-05   | 8.32E-49  | 9.71E-02 | 7.08E-01   | 3         | 24   | >100       | 22   |
|                  | B2*            | A                  | 6.32E-35  | 1.91E-13 | 2.30E-05   | 8.32E-49  | 3.28E-17 | 1.00E-01   | 16        | >100 | >100       | 19   |
|                  | C2*            | A                  | 3.55E-11  | 3.50E-05 | 7.02E-05   | 2.91E-24  | 6.82E-14 | 1.00E-01   | 15        | >100 | >100       | 29   |
|                  | Ac1            | B                  | 4.05E-03  | 6.54E-03 | 9.25E-03   | 1.53E-01  | 1.80E-01 | 2.13E-01   | 5         | 6    | 7          | 91   |
|                  | Bc1            | B                  | 3.30E-10  | 2.24E-09 | 2.44E-03   | 1.28E-01  | 1.42E-01 | 1.54E-01   | 7         | 8    | 10         | 124  |
|                  | Cc1            | B                  | 1.19E-02  | 2.10E-02 | 2.54E-02   | 5.45E-09  | 8.56E-03 | 3.21E-02   | 10        | 17   | 38         | 256  |
|                  | Group dynamics | A                  | 1.13E-14  | 2.33E-05 | 3.50E-05   | 1.31E-25  | 3.29E-05 | 9.77E-02   | 16        | >100 | >100       | 56   |
| Group dynamics   | B              | 1.66E-03           | 3.08E-03  | 4.21E-03 | 8.91E-02   | 9.53E-02  | 1.02E-01 | 9          | 10        | 12   | 2056       |      |
| Rsa <sup>B</sup> | A2*            | A                  | 1.23E-06  | 1.80E-02 | 3.92E-02   | 9.35E-02  | 1.65E-01 | 2.38E-01   | 3         | 5    | 12         | 90   |
|                  | B2*            | A                  | 2.22E-02  | 4.06E-02 | 5.22E-02   | 7.97E-09  | 2.42E-02 | 7.84E-02   | 5         | 8    | 20         | 222  |
|                  | C2*            | A                  | 6.35E-03  | 1.18E-02 | 1.57E-02   | 2.24E-04  | 1.71E-02 | 3.82E-02   | 13        | 22   | 71         | 184  |
|                  | Ac1            | B                  | 4.36E-08  | 2.36E-07 | 2.83E-01   | 4.22E-08  | 5.52E-01 | 7.77E-01   | 0         | 1    | >100       | 33   |
|                  | Bc1            | B                  | 2.79E-06  | 1.08E-05 | 8.36E-01   | 2.09E-01  | 6.01E-01 | 6.35E-01   | 0         | 1    | 4          | 159  |
|                  | Cc1            | B                  | 5.15E-08  | 1.33E-01 | 1.62E-01   | 1.27E-07  | 2.78E-07 | 3.84E-01   | 1         | 2    | >100       | 36   |
|                  | Group dynamics | A                  | 1.95E-02  | 2.58E-02 | 2.76E-02   | 3.78E-09  | 1.22E-08 | 1.62E-02   | 12        | 17   | 23         | 739  |
|                  | Group dynamics | B                  | 3.03E-07  | 1.82E-01 | 2.20E-01   | 7.43E-07  | 4.04E-06 | 3.61E-01   | 1         | 1    | >100       | 311  |
| RSF1010          | AncA           | B                  | 1.45E-07  | 1.60E-01 | 1.92E-01   | 6.55E-08  | 6.87E-07 | 3.48E-01   | 1         | 2    | >100       | 48   |
|                  | AncB           | B                  | 2.71E-07  | 9.49E-06 | 3.39E-01   | 5.27E-06  | 2.99E-01 | 2.87E+00   | 0         | 1    | >100       | 23   |
|                  | AncC           | B                  | 1.50E-06  | 8.87E-06 | 7.07E-01   | 2.32E-06  | 4.38E-01 | 7.18E+00   | 0         | 1    | >100       | 27   |
|                  | A2*            | A                  | 3.88E-04  | 5.92E-04 | 2.92E-03   | 9.23E-06  | 5.85E-02 | 6.87E-02   | 15        | 22   | >100       | 132  |
|                  | B2*            | A                  | 8.81E-04  | 1.28E-03 | 1.69E-03   | 5.47E-02  | 6.29E-02 | 7.30E-02   | 15        | 18   | 22         | 149  |
|                  | C2*            | A                  | 1.11E-04  | 2.46E-04 | 1.25E-03   | 2.20E-06  | 5.10E-02 | 7.06E-02   | 17        | 27   | >100       | 112  |
|                  | Ac1            | B                  | 4.47E-08  | 1.33E-01 | 1.59E-01   | 2.95E-08  | 1.99E-07 | 3.20E-01   | 1         | 2    | >100       | 50   |
|                  | Bc1            | B                  | 1.72E-06  | 8.41E-06 | 8.50E-01   | 1.04E-01  | 5.28E-01 | 1.47E+00   | 0         | 1    | 5          | 35   |
|                  | Cc1            | B                  | 1.65E-08  | 1.13E-01 | 1.49E-01   | 2.53E-08  | 1.59E-07 | 2.36E-01   | 1         | 3    | >100       | 58   |
|                  | Group dynamics | A                  | 6.35E-04  | 8.03E-04 | 1.04E-03   | 4.55E-02  | 5.25E-02 | 5.85E-02   | 20        | 23   | 27         | 1124 |
| Group dynamics   | B              | 8.56E-08           | 1.46E-01  | 1.63E-01 | 1.20E-07   | 1.78E-07  | 2.74E-01 | 1          | 2         | >100 | 584        |      |

<sup>A</sup> Based on cluster analysis, see Fig. 4.

<sup>B</sup> Due to the high instability of plasmid Rsa in the ancestors, its persistence dynamics in this host could not be determined.

Table S5 is in Supplementary file S2.

**Table S6. Estimated plasmid persistence dynamics and BIC for the allelic exchange mutants.**

| Strain                              | Group <sup>A</sup> | $\lambda$ |          |            | $\sigma$  |          |            | $T_{1\%}$ |     |            | BIC |
|-------------------------------------|--------------------|-----------|----------|------------|-----------|----------|------------|-----------|-----|------------|-----|
|                                     |                    | CI (2.5%) | MLE      | CI (97.5%) | CI (2.5%) | MLE      | CI (97.5%) | CI (2.5%) | MLE | CI (97.5%) |     |
| Anc.Xpd <sub>Anc</sub> <sup>B</sup> | B                  | 3.98E-09  | 1.50E-08 | 7.20E-03   | 3.51E-02  | 6.03E-02 | 6.62E-02   | 12        | 47  | 83         | 178 |
| Anc.Xpd <sub>Evo</sub>              | B                  | 1.72E-09  | 1.86E-08 | 6.20E-03   | 6.00E-02  | 8.20E-02 | 8.82E-02   | 10        | 34  | 52         | 176 |
| Ac1.Xpd <sub>Evo</sub>              | A                  | 2.22E-03  | 3.07E-03 | 4.22E-03   | 3.31E-02  | 4.43E-02 | 5.39E-02   | 17        | 21  | 28         | 158 |
| Ac1.Xpd <sub>Anc</sub>              | B                  | 3.04E-09  | 1.05E-02 | 2.22E-02   | 4.50E-02  | 7.91E-02 | 1.09E-01   | 6         | 10  | 67         | 134 |
| A2.H <sub>E</sub> P <sub>A</sub>    | A                  | 3.02E-06  | 6.89E-04 | 1.38E-03   | 6.31E-11  | 1.83E-02 | 3.92E-02   | 25        | 57  | >100       | 152 |
| Anc.UvrD <sub>Anc</sub>             | B                  | 2.20E-09  | 1.84E-08 | 7.85E-03   | 3.95E-02  | 6.48E-02 | 6.99E-02   | 12        | 43  | 77         | 157 |
| Anc.UvrD <sub>Evo</sub>             | B                  | 5.67E-09  | 1.97E-03 | 8.61E-03   | 5.23E-02  | 7.22E-02 | 8.34E-02   | 10        | 15  | 56         | 163 |
| Ac1.UvrD <sub>Evo</sub>             | A                  | 7.19E-14  | 3.68E-10 | 3.97E-04   | 3.38E-12  | 2.54E-01 | 3.71E-01   | 4         | 14  | >100       | 36  |
| Ac1.UvrD <sub>Anc</sub>             | B                  | 2.28E-08  | 9.82E-03 | 2.17E-02   | 5.15E-03  | 3.20E-02 | 5.47E-02   | 9         | 18  | >100       | 152 |
| B2.H <sub>E</sub> P <sub>A</sub>    | A                  | 4.84E-05  | 1.31E-04 | 8.31E-04   | 1.04E-06  | 6.04E-02 | 7.90E-02   | 15        | 25  | >100       | 96  |

<sup>A</sup> Grouping is based on cluster analysis, see Fig. 6; <sup>B</sup> The evolved or ancestral alleles of Xpd/Rad3<sub>D672A</sub> and P<sub>UvrD\_A-32C</sub> are denoted as Xpd<sub>Evo</sub>, Xpd<sub>Anc</sub>, UvrD<sub>Evo</sub> or UvrD<sub>Anc</sub>.

**Table S7.  $\Delta$ BIC for comparisons of the Xpd/Rad3 allelic exchange mutant persistence profiles.**

|                        | Anc.Xpd <sub>Anc</sub> | Ac1.Xpd <sub>Anc</sub> | A2.H <sub>E</sub> P <sub>A</sub> |
|------------------------|------------------------|------------------------|----------------------------------|
| Anc.Xpd <sub>Evo</sub> | -30                    | NA                     | NA                               |
| Ac1.Xpd <sub>Evo</sub> | NA                     | -902                   | -455                             |

**Table S8.  $\Delta$ BIC for comparisons of the P<sub>UvrD\_A-32C</sub> allelic exchange mutant persistence profiles.**

|                         | Anc.UvrD <sub>Anc</sub> | Ac1.UvrD <sub>Anc</sub> | B2.H <sub>E</sub> P <sub>A</sub> |
|-------------------------|-------------------------|-------------------------|----------------------------------|
| Anc.UvrD <sub>Evo</sub> | 0.53                    | NA                      | NA                               |
| Ac1.UvrD <sub>Evo</sub> | NA                      | -2071                   | -39                              |

Table S9 is in Supplementary file S2.

**Table S10. Primers used in this study.**

| Primers <sup>A</sup>  | Purpose/Sequence <sup>B</sup>                                                                        |
|-----------------------|------------------------------------------------------------------------------------------------------|
| 16S-F                 | Quantitation of 16S rRNA: GGAAGGGCAGTAAGCGAATA                                                       |
| 16S-R                 | Quantitation of 16S rRNA: CGCTTGACCCTCTGTATTA                                                        |
| CS1-H2helicase1-F     | Xpd/Rad3 SNP quantification; 5'- <u>ACACTGACGACATGGTTCTACA</u> ACAATCTTGAAGTCGTCTTACGGA-3'           |
| CS2-H2helicase1-R     | Xpd/Rad3 SNP quantification; 5'- <u>TACGGTAGCAGAGACTTGGTCTT</u> GAGCCCTACATTCTCAAATGCTA-3'           |
| CS1-H2helicase2prom-F | UvrD operon promoter SNP quantification; 5'- <u>ACACTGACGACATGGTTCTACA</u> CTGAGGCCATCAACAAGCTTG-3'  |
| CS2-H2helicase2prom-R | UvrD operon promoter SNP quantification; 5'- <u>TACGGTAGCAGAGACTTGGTCT</u> CGATGACGGTGATCTCGGTAAC-3' |
| pPS04_aph_F           | Verify pPS04 insertion; 5'-GTGTTATGAGCCATATTCAACGGG-3'                                               |
| pPS04_aph_R           | Verify pPS04 insertion; 5'-GCCAGTGTTACAACCAATTAACCA-3'                                               |
| UvrD_helicase_F       | Quantitation of <i>uvrD</i> ; 5'-GACGACATCACGAAATACGAGAAG-3'                                         |
| UvrD_helicase_R       | Quantitation of <i>uvrD</i> ; 5'-GACCTTGATGATCTGGGTCCTC-3'                                           |
| UvrD_Prom_F           | Cloning 573-bp UvrD operon promoter fragment into pPS04; 5'-TCTAGACAATTTGCGGACATTCTATCG -3'          |
| UvrD_Prom_R           | Cloning 573-bp UvrD operon promoter fragment into pPS04; 5'-CATATGATTCCCACAGTGTGGAGTTTAA-3'          |
| Xpd/Rad3_F            | Cloning 800-bp Xpd/Rad3 fragment into pPS04; 5'- TCTAGACTGGACAATCTTGAAGTCGTCTTAC -3'                 |
| Xpd/Rad3_R            | Cloning 800-bp Xpd/Rad3 fragment into pPS04; 5'- CATATGAGGCCATCTTTGTTAACGATGTTG -3'                  |

<sup>A</sup> All primers were designed specifically for this study; <sup>B</sup> Underlined regions represent the CS1 and CS2 tags for attaching Illumina barcodes.
